# Supplementary material for: De novo assembly of Dekkera bruxellensis: a multi technology approach using short and long-read sequencing and optical mapping
Source: PubMed Central journal article supplement (PMC4661999; doi:10.1186/s13742-015-0094-1), 2015-11-26
Supplement: 13742_2015_94_MOESM1_ESM.pdf [file 13742_2015_94_MOESM1_ESM.pdf]

# Methods

## Miscellaneous

### Strains and culture media

We used the industrial isolate of *D. bruxellensis* CBS 11270 (Blomqvist et al. 2010). Yeast extract–peptone–dextrose medium (YPD) was prepared as described earlier (Tiukova, Eberhard, and Passoth).

### Cultivation

*D. bruxellensis* cultures were incubated in 50 ml YPD in 200 ml shake-flasks with shaking (200 rpm) at 30°C for approximately 20 hours.

### K-mer length selection

To assess what effect differing k-mer lengths have on assembling our data, we produced ten SOAPdenovo assemblies using a variety of k-mer input parameters: from k=43 to k=97, in increments of six. FRC curves (Additional Figure 6) plotted for these, we see that the quality is increasing with higher k values but reaches a plateau at k=61. The standard contiguity metrics show that k=61 to be superior (Additional Table 2).

### DNA sequencing

A summary of all the sequenced libraries can be found in Additional Table 5.

### DNA extraction

One millilitre of *D. bruxellensis* culture grown in 50 ml YPD at 30°C to OD 10 was harvested. Cell pellet was mixed with 100 µl protoplasting buffer (100 mM Tris-Cl (pH 7.5), 10 mM EDTA, 0.2 µl beta-mercaptoethanol, 10 units of lyticase) and incubated at 37°C for 3 hours. One hundred microlitres of lysis buffer (200 mM NaOH, 1 % SDS) was added to cell suspension and incubated at 65°C for 20 minutes. After being rapidly cooled on ice, suspension was mixed with 100 µl of 5 M potassium acetate buffer (pH 5.4) and centrifuged. Supernatant was harvested and mixed with 200 µl ice-cold 2-propanol and incubated on ice for 30 min and centrifuged. DNA pellet was washed with 300 µl of 70 % ethanol and dried. DNA was dissolved in water.

### Short-read sequencing

Four libraries were prepared for Illumina Hiseq 2500 sequencing: two paired-end libraries using TrueSeq DNA kit (Illumina, CA, USA) with 150bp and 650bp insert sizes, two mate-pair libraries using Nextera mate pair kit (Illumina, CA, USA) with 3kbp insert size and one library with 5kbp insert size.

Preparation of the paired-end libraries was made according to the manufacturers specifications, with the following changes: protocols were automated using an Agilent NGS workstation (Agilent, CA, USA), all the purification and gel-cut steps were replaced by a magnetic bead clean-up method (Lundin et al. 2010; Borgström, Lundin, and Lundeberg 2011) and fragmentation was performed using a Covaris S2 instrument (Covaris Inc., MA, USA).

The mate-pair libraries were constructed using using the Gel-Plus protocol following the instructions given by the manufacturer. Tagmentation cleanup was performed using Genomic DNA Clean & Concentrator (Zymo Research, CA, USA). Size selection was made between 2 and 5 kbp, and between 4 and 7 kbp on a Blue Pippin (Sage Science Inc., MA, USA) using the 0.75% 1-10 kb Gel Cassette with Marker S1 (2-6kb and

3-10kb). Final library clean up was automated and performed on a MBS 1200 pipetting station (Nordiag AB, Sweden) using magnetic bead clean-up methods (Lundin et al. 2010; Borgström, Lundin, and Lundeberg 2011). The short mate-pairs were amplified in 10 to 13 PCR cycles, and the long mate-pairs were amplified in 14 cycles.

## Long-read sequencing

Genomic *D. bruxellensis* DNA was used to create two libraries of different fragment length. DNA for the 2kb library was fragmented by sonication using the Covaris S2 system and the DNA for 10kb library was fragmented using a HydroShear® DNA Shearing Device (GeneMachines). Fragmented DNA was end-repaired and adaptors were ligated to generate SMRTbells™ for circular consensus sequencing. Libraries were exo-treated for product clean up following 2 kb and 10 kb template preparation protocols provided by the manufacture. Sequencing primer and P4 polymerase were annealed to the SMRTbell™ libraries and bound to magnetic beads. The libraries were loaded on 2 SMRTcells™ per fraction, using magbead loading and sequenced on the PacBio RS II system using C2 chemistry and a 120 minutes movie time.

## Optical mapping

### Sample preparation

Yeast chromosomes for analysis in OpGen's Argus system were prepared by a modification of the chromosome embedment in agarose plugs procedure by Carle and Olson (Schwartz and Cantor 1984; Carle and Olson 1985). Cells were grown in 50 ml YPD at 30°C to an optical density at 600 nm (OD<sub>600</sub>) of 10, harvested and washed in 5 ml of water, 7 ml of 10 mM EDTA and finally in 7 ml of Sortrisca solution (0.1 M Tris-Cl pH 7.5; 10 mM CaCl<sub>2</sub>; 1.2 M sorbitol). The pellet was incubated for 30 minutes at 30°C in a solution prepared by mixing of 10 ml of Sortrisca solution, 2 mg of lyticase and 20 µl of mercapto-ethanol. The cells were washed twice in 7 ml Sortrisca solution. 5\*10<sup>9</sup> cells resuspended in 1 ml Sortrisca were mixed with 2 ml of agarose solution, cooled to 45°C, prepared by mixing of 20 mg low melting point agarose in 0.125 M EDTA. Cells and agarose mixture was poured into the 10-Well Disposable Plug Mold (Bio-RAD, N170-3713). After solidification the plugs were incubated for 30 min at 4°C, removed from form and transferred into NDS-buffer (0.5 M EDTA, 0.1 M Tris, 1% Na lauroyl sarcosine). The plugs were incubated for two hours with buffer change every 30 minutes. Subsequently, the plugs were incubated in a series of buffers: proteinase solution (1 mg Proteinase K in 3 ml of NDS buffer) at 50°C for 24 hours; LET-buffer pH 7.5 (0.5 M EDTA, 0.1 M Tris) for 5 minutes and Rnase solution (1250 U of T1-Rnase in 3ml LET-buffer) at 37°C for 24 hours. Prepared plugs were stored at 4°C.

### Data generation

The Argus system (OpGen®) was used to obtain seven optical maps, using the restriction enzyme KpnI and four HD MapCards. This system fully integrate wet lab chemistry with automatic collection of fluorescence microscope images. To better facilitate the manual editing of the contig-optical map placements in OpGen's MapSolver™ software, the two assemblies selected for this process were trimmed to a minimum contig size of 40 kbp. The output from MapSolver is a report containing the placement coordinates of the de novo assembled contigs relative the optical map, along with their relative orientation. From this, we used the 'opgen\_util.py' script of de novo scilife package. It produces a single continuous sequence for each optical map by simply translating the placed contig coordinates to the map coordinates and performing inversions where reported. Sequence overlaps between the two placed assembly contigs, in part reduced by the manual editing, was resolved by always selecting the sequences with the fewest ambiguous basecalls.

## Program versions and commands

### Versions

- trimmomatic/0.30
- fastqc/0.10.1
- abyss/1.3.5
- allpathslg/49618
- SOAPdenovo/2.04-r240
- FRC\_align/4bfa2f8 ^
- qaCompute/95c8fd7 ^
- cabog/8.1
- OpGen(r) MapSolver/v.3.2.4
- FALCON/5c46b5f ^
- cegma/2.4.010312
- BWA/0.7.4
- samtools/0.1.19
- picard/1.92

^ Git commit hash

### Commands

See github repository: <https://github.com/remiolsen/vp2015>.

## Additional illustrations

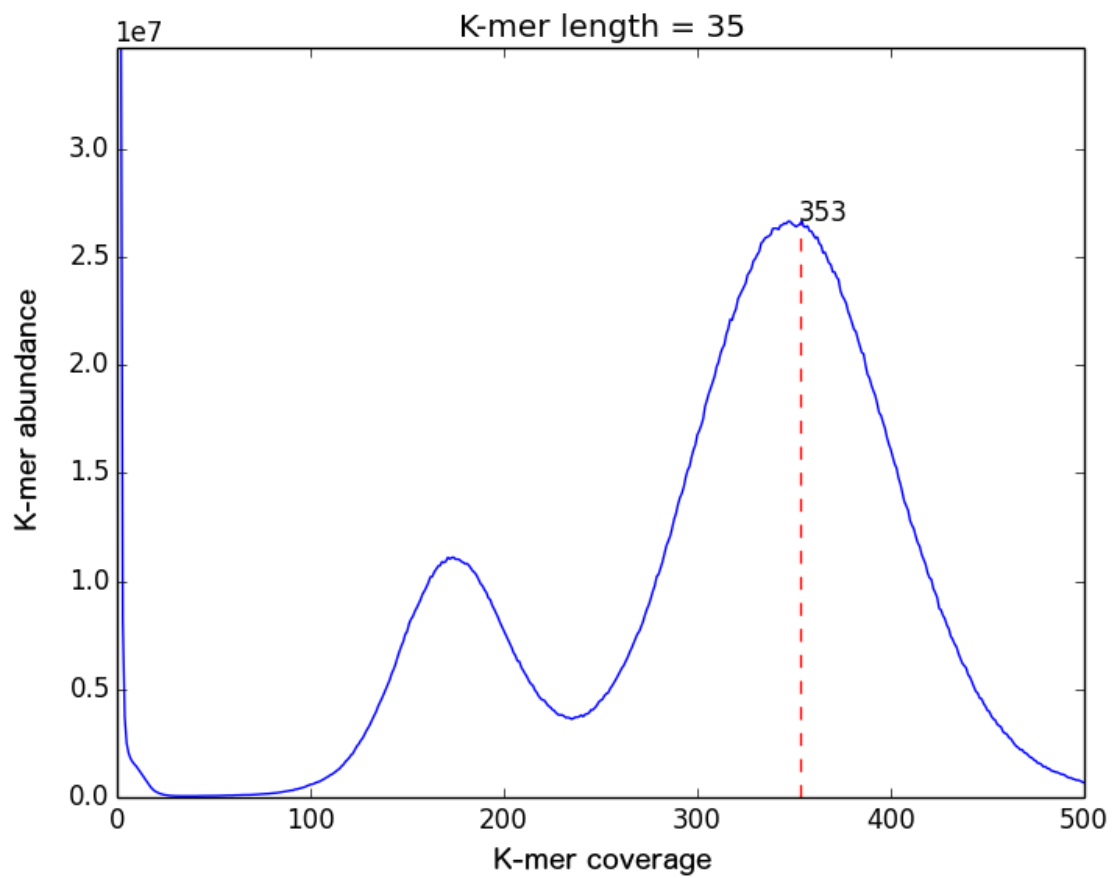

Figure 1. K-mer abundance plot for the PE 150bp insert library, for  $k = 35$ . A clear and bell shaped peak can be seen at coverage level 353, while another at approx. half that coverage indicates that the sampled genome is heterozygous.

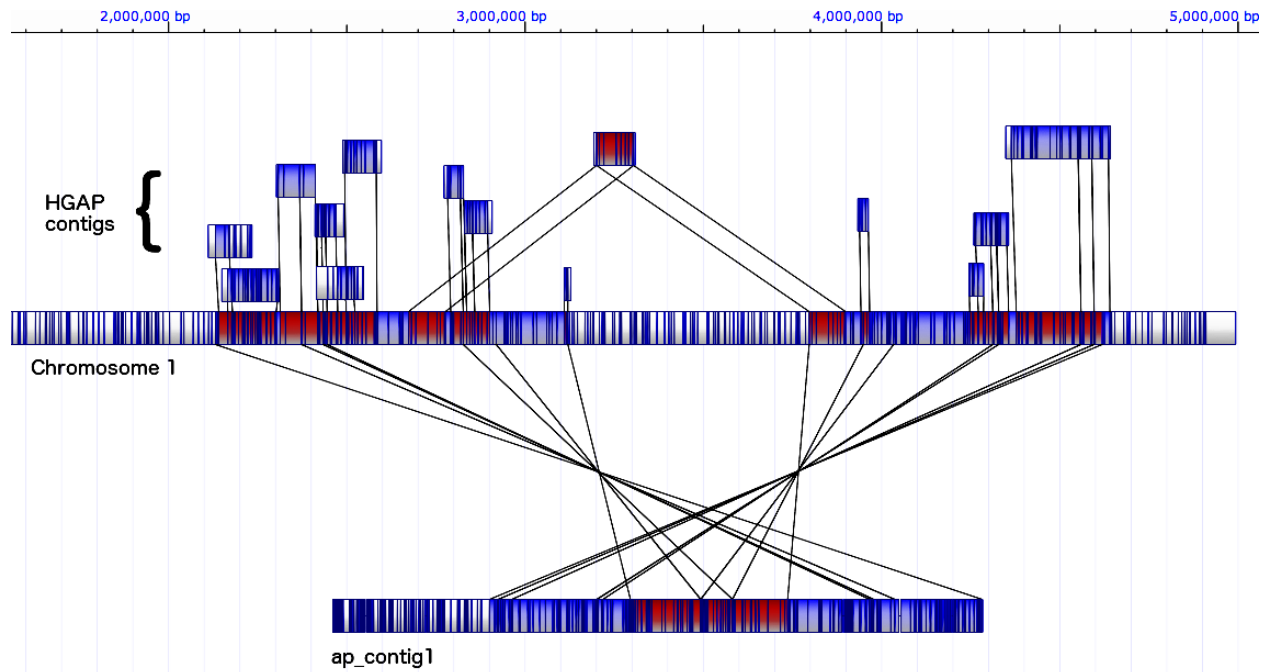

Figure 2. Colourised and annotated screenshot from the OpGen® MapSolver™ software showing a repeat structure in the map Chromosome 1 which allpaths-lg collapsed, but HGAP were not able to fully cover.

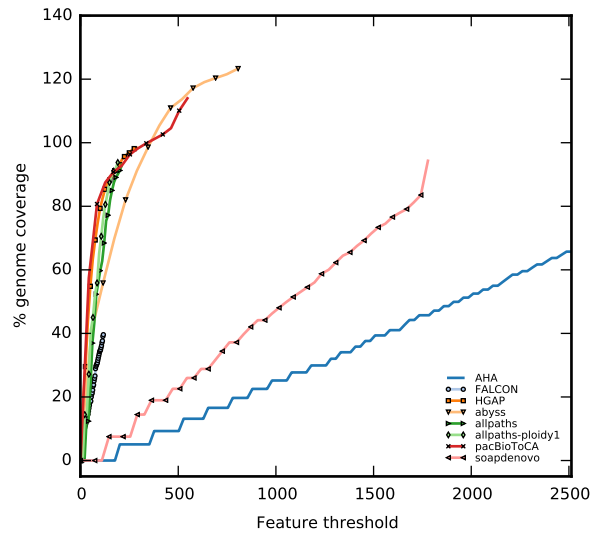

Figure 3. Feature response curve for the feature ‘COMPR\_MP’ in the eight *de novo* assemblies produced. This is a suspected mis-assembly inferred from mapped mate-pair reads that exhibit shorter insert sizes than their expectation. This feature is notable for the AHA and soapdenovo assemblies.

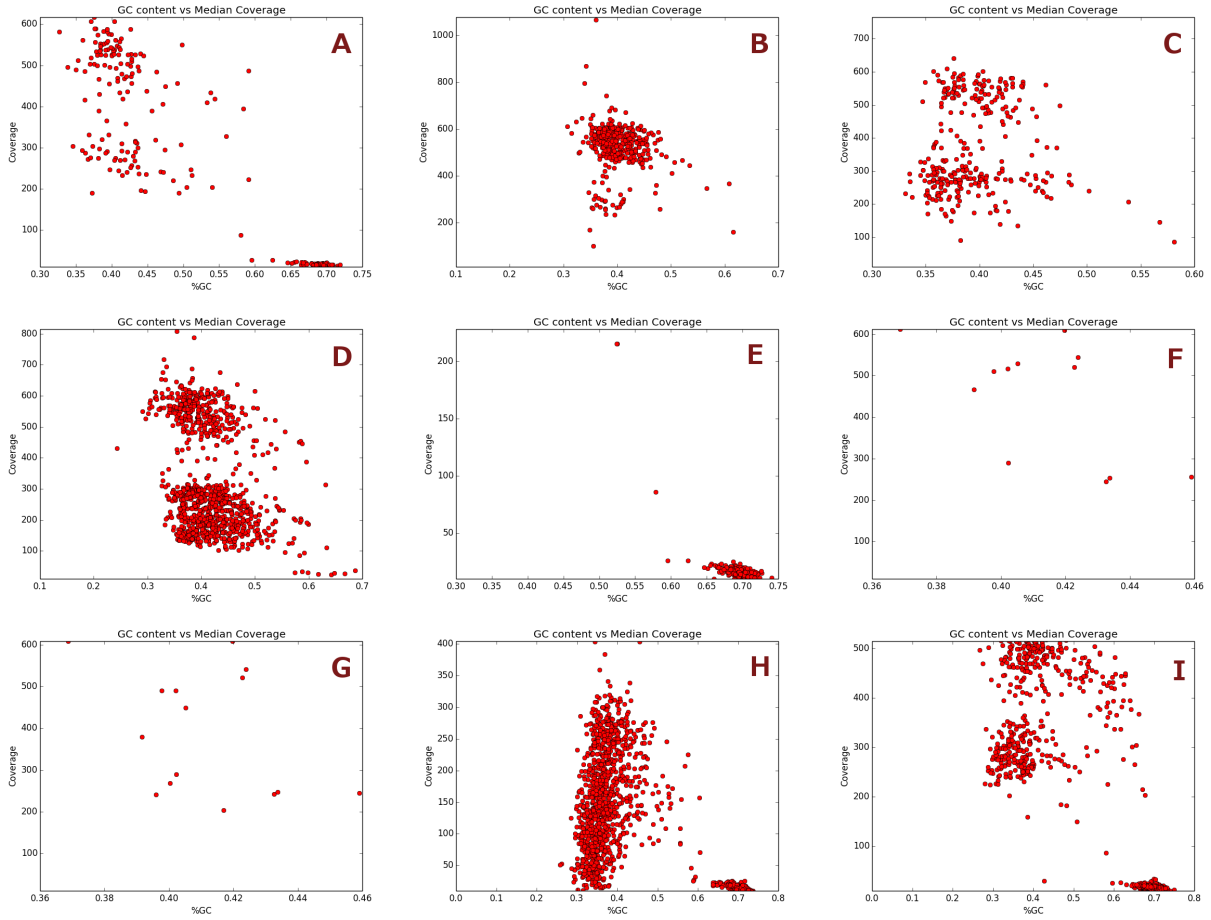

Figure 4. Contig %GC (without outliers) plotted versus median contig coverage (x-axis) for assemblies: (A) AHA, (B) FALCON, (C) HGAP, (D) abyss, (E) allpaths-lg, (F) final assembly chr1-4, (G) assembly chr1-7, (H) pacBioToCA and (I) soapdenovo.

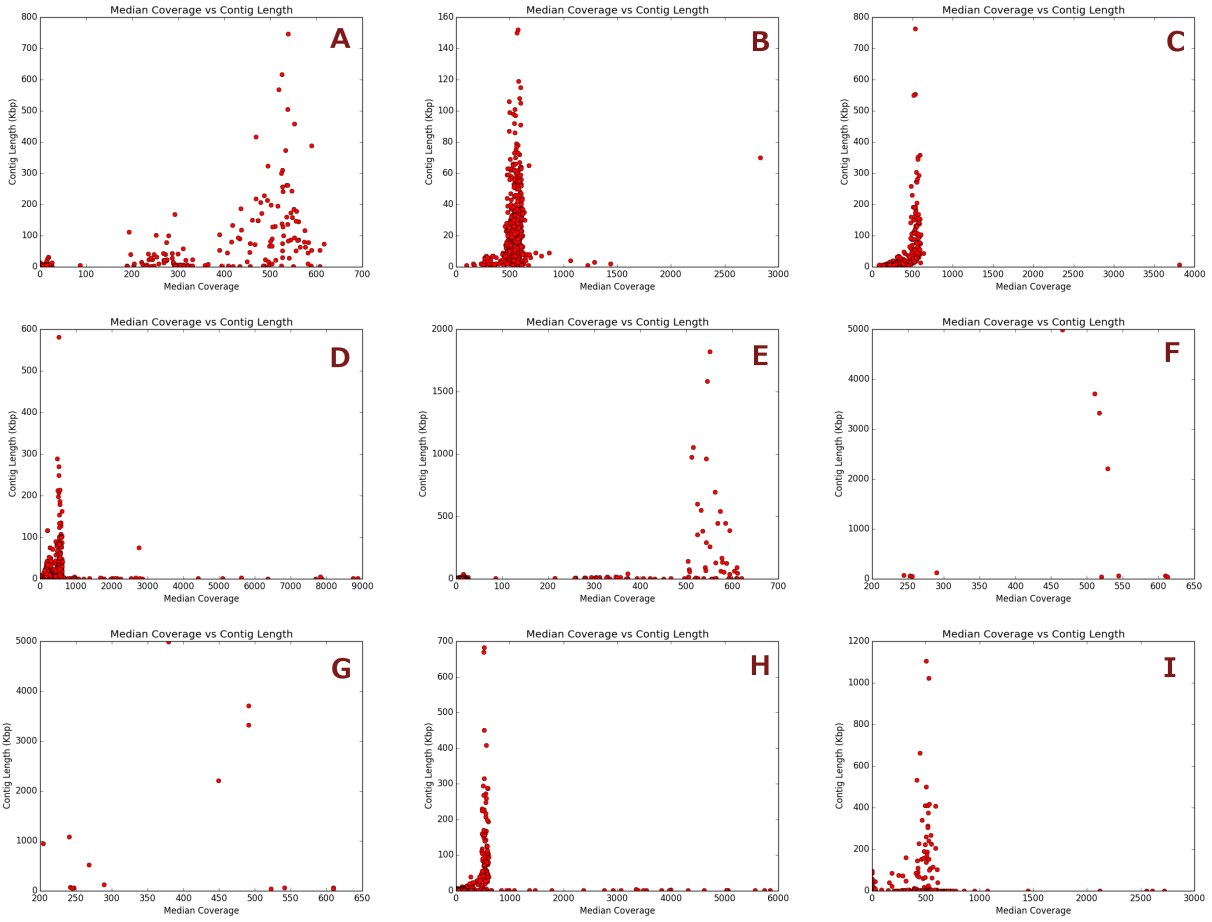

Figure 5. Contig length plotted versus median contig coverage (x-axis) for assemblies: (A) AHA, (B) FALCON, (C) HGAP, (D) abyss, (E) allpaths-lg, (F) final assembly chr1-4, (G) assembly chr1-7, (H) pacBioToCA and (I) soapdenovo.



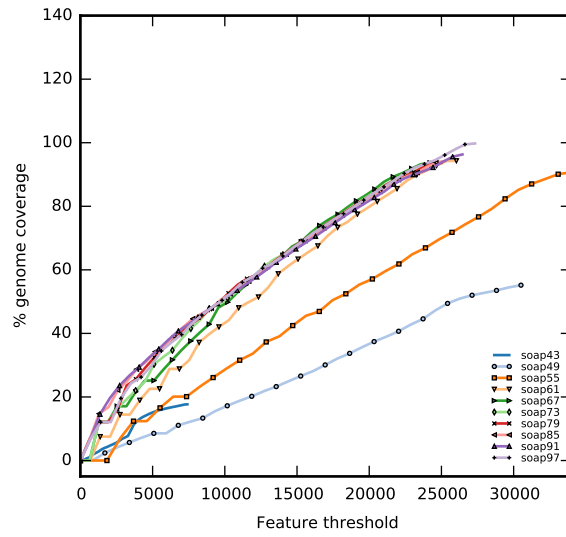

Figure 6. FRC curves for SOAPdenovo assemblies using k-mer size parameters  $k=(43, 49, \dots, 97)$ .

## Additional tables

| Assembler  | Complete/Partial | Prots | %Completeness | Total | Average | %Ortho |
|------------|------------------|-------|---------------|-------|---------|--------|
| AHA        | Complete         | 222   | 89.52         | 262   | 1.18    | 14.86  |
| FALCON     | Complete         | 179   | 72.18         | 188   | 1.05    | 5.03   |
| HGAP       | Complete         | 245   | 98.79         | 280   | 1.14    | 11.02  |
| abyss      | Complete         | 244   | 98.39         | 406   | 1.66    | 32.79  |
| allpaths   | Complete         | 245   | 98.79         | 272   | 1.11    | 8.57   |
| chr1-7     | Complete         | 238   | 95.97         | 322   | 1.35    | 30.25  |
| chr1-4     | Complete         | 237   | 95.56         | 285   | 1.2     | 17.72  |
| pacBioToCA | Complete         | 245   | 98.79         | 312   | 1.27    | 17.14  |
| soapdenovo | Complete         | 165   | 66.53         | 179   | 1.08    | 5.45   |
| AHA        | Partial          | 239   | 96.37         | 294   | 1.23    | 17.99  |
| FALCON     | Partial          | 192   | 77.42         | 210   | 1.09    | 8.33   |
| HGAP       | Partial          | 246   | 99.19         | 292   | 1.19    | 14.23  |
| abyss      | Partial          | 246   | 99.19         | 418   | 1.7     | 34.55  |
| allpaths   | Partial          | 246   | 99.19         | 285   | 1.16    | 12.6   |
| chr1-7     | Partial          | 240   | 96.77         | 336   | 1.4     | 33.33  |
| chr1-4     | Partial          | 240   | 96.77         | 297   | 1.24    | 20     |
| pacBioToCA | Partial          | 246   | 99.19         | 336   | 1.37    | 22.76  |
| soapdenovo | Partial          | 217   | 87.5          | 255   | 1.18    | 12.9   |

Table 1. Parsed output from CEGMA for all assemblies generated. Of note is the the higher % Orthologous hits when including chromosomes 5 to 7 in the final version of the assembly and the addition of one complete hit.

| assembler | n_scaff | n_scaff>1000 | N50    | N80   | max_scf_lgth | Ass_lgth | Ass_lgth_ctgs>1000 |
|-----------|---------|--------------|--------|-------|--------------|----------|--------------------|
| soap43    | 70469   | 503          | 206    | 132   | 93720        | 14642557 | 1706712            |
| soap49    | 71657   | 626          | 748    | 278   | 354495       | 21125096 | 7076407            |
| soap55    | 100990  | 447          | 165585 | 7064  | 1040618      | 28976782 | 12392192           |
| soap61    | 66606   | 396          | 263103 | 49423 | 1117059      | 25625475 | 13038098           |
| soap67    | 54616   | 379          | 244812 | 41887 | 1021989      | 24629116 | 12923836           |
| soap73    | 48694   | 407          | 158153 | 16408 | 1015993      | 24227966 | 12714957           |
| soap79    | 44914   | 452          | 106930 | 14709 | 1008978      | 24138274 | 12827351           |
| soap85    | 42352   | 492          | 77839  | 12765 | 1003316      | 24008233 | 12772430           |
| soap91    | 41482   | 595          | 61150  | 10078 | 999385       | 24286623 | 12828418           |
| soap97    | 33988   | 454          | 110017 | 21640 | 1002503      | 23132722 | 13363549           |

Table 2. Standard contiguity statistics for test assemblies running SOAPdenovo with a variation of k=(43, 49, ..., 97).

| Gap type         | ALLPATHS+HGAP | Covered by HGAP only | % recovered | % genome recovered |
|------------------|---------------|----------------------|-------------|--------------------|
| Optical map gaps | 1925338       | 487073               | 25.30       | 3.42               |
| Scaffold gaps    | 333920        | 224043               | 67.09       | 1.57               |
| Ambiguous bases  | 39426         | 33130                | 84.03       | 0.23               |
| Total            | 2298684       | 744246               | 32.38       | 5.23               |

Table 3. A summary of the gaps in the optical map assisted assembly that were covered exclusively by HGAP data. The genome is the length of the optical maps chr1-4: 14230630 bp.

| Assembler  | Wall time (minutes) | Peak memory usage (Gb) | Data input                           |
|------------|---------------------|------------------------|--------------------------------------|
| AHA        | 195                 | 3.6                    | PacBio, PE150, PE650, MPS1/2, MPL1/2 |
| FALCON     | 2                   | 16.6                   | PacBio                               |
| HGAP       | 435                 | 1.9                    | PacBio                               |
| abyss      | 151                 | 12.1                   | PE150, PE650, MPS1/2, MPL1/2         |
| allpaths   | 828                 | 103.2                  | PE150, PE650, MPS1/2, MPL1/2         |
| pacBioToCA | 1659                | 73.9                   | PacBio, PE150                        |
| soapdenovo | 43                  | 15.0                   | PE150, PE650, MPS1/2, MPL1/2         |

Table 4. The resource usage of the assemblers measured in wall time and peak memory usage. Lastly are the sequencing libraries (see Additional Table 5) used as input. The programs were run on a compute node with 16 Intel Xeon CPU cores and 128 Gb of RAM.

| Library | Type                    | Mean read length | Yield (in Mbp) | Mbp survived trimming |
|---------|-------------------------|------------------|----------------|-----------------------|
| PE150   | Paired-end 150bp insert | 100              | 7711           | 7666                  |
| PE650   | Paired-end 650bp insert | 100              | 3517           | 3442                  |
| MPS1    | Mate-pair short         | 100              | 4630           | 3878                  |
| MPS2    | Mate-pair short         | 100              | 5522           | 4582                  |
| MPL1    | Mate-pair long          | 100              | 5141           | 4266                  |
| MPL2    | Mate-pair long          | 100              | 884            | 808                   |
| PacBio  | Filtered subreads       | 1826             | 730            | 730                   |

Table 5. A summary of all the sequence libraries showing mean read length (in bp, before trimming) and sequence yield in Mbp before and after trimming. Note that the PacBio data was not trimmed.

## References

- Blomqvist, Johanna, Thomas Eberhard, Johan Schnürer, and Volkmar Passoth. 2010. “Fermentation characteristics of *Dekkera bruxellensis* strains.” *Applied Microbiology and Biotechnology* 87 (4): 1487–97. doi:[10.1007/s00253-010-2619-y](https://doi.org/10.1007/s00253-010-2619-y).
- Borgström, Erik, Sverker Lundin, and Joakim Lundeberg. 2011. “Large scale library generation for high throughput sequencing.” *PloS One* 6 (4): e19119. doi:[10.1371/journal.pone.0019119](https://doi.org/10.1371/journal.pone.0019119).
- Carle, G F, and M V Olson. 1985. “An electrophoretic karyotype for yeast.” *Proceedings of the National Academy of Sciences of the United States of America* 82 (11): 3756–60. <http://www.pubmedcentral.nih.gov/articlerender.fcgi?artid=397866/&tool=pmcentrez/&rendertype=abstract>.
- Lundin, Sverker, Henrik Stranneheim, Erik Pettersson, Daniel Klevebring, and Joakim Lundeberg. 2010. “Increased throughput by parallelization of library preparation for massive sequencing.” *PloS One* 5 (4): e10029. doi:[10.1371/journal.pone.0010029](https://doi.org/10.1371/journal.pone.0010029).
- Schwartz, D C, and C R Cantor. 1984. “Separation of yeast chromosome-sized DNAs by pulsed field gradient gel electrophoresis.” *Cell* 37 (1): 67–75. <http://www.ncbi.nlm.nih.gov/pubmed/6373014>.
- Tiukova, Ievgeniia, Thomas Eberhard, and Volkmar Passoth. “Interaction of *Lactobacillus vini* with the ethanol-producing yeasts *Dekkera bruxellensis* and *Saccharomyces cerevisiae*.” *Biotechnology and Applied Biochemistry* 61 (1): 40–44. doi:[10.1002/bab.1135](https://doi.org/10.1002/bab.1135).
